# Supplementary material for: Four New Chloro-Eremophilane Sesquiterpenes from an Antarctic Deep-Sea Derived Fungus, Penicillium sp. PR19N-1
Source: MDPI journal article supplement (doi:10.3390/md11041399), 2013-04-23
Supplement: s1 [file s1]

marinedrugs-11-01399-s001.mol
  corina  04151405343D 1   1.00000     0.00000 
CORINA 3.49 0023  12.04.2013
 19 20  0  0  0  0  0  0  0  0999 V2000
   -0.0947    1.3364   -0.0246 C   0  0  0  0  0  0  0  0  0  0  0  0
    0.0178   -0.1583   -0.0179 C   0  0  0  0  0  0  0  0  0  0  0  0
    1.3872   -0.6199   -0.5177 C   0  0  0  0  0  0  0  0  0  0  0  0
    2.4751    0.1375    0.2487 C   0  0  0  0  0  0  0  0  0  0  0  0
    2.3157    1.6029   -0.0422 C   0  0  0  0  0  0  0  0  0  0  0  0
    0.9536    2.1548   -0.0290 C   0  0  0  0  0  0  0  0  0  0  0  0
    3.8331   -0.3825   -0.0777 C   0  0  0  0  0  0  0  0  0  0  0  0
    4.8511    0.4037   -0.4124 C   0  0  0  0  0  0  0  0  0  0  0  0
    4.6626    1.8654   -0.4919 C   0  0  0  0  0  0  0  0  0  0  0  0
    3.3583    2.4009   -0.3441 C   0  0  0  0  0  0  0  0  0  0  0  0
    5.6145    2.6013   -0.6824 O   0  0  0  0  0  0  0  0  0  0  0  0
    6.0679   -0.1393   -0.6814 O   0  0  0  0  0  0  0  0  0  0  0  0
    0.7132    3.8741   -0.0199 Cl  0  0  0  0  0  0  0  0  0  0  0  0
    2.2419   -0.0796    1.7452 C   0  0  0  0  0  0  0  0  0  0  0  0
    1.5414   -2.1227   -0.2754 C   0  0  0  0  0  0  0  0  0  0  0  0
   -0.1810   -0.6430    1.3363 O   0  0  0  0  0  0  0  0  0  0  0  0
   -1.4394   -0.9358    1.7001 C   0  0  0  0  0  0  0  0  0  0  0  0
   -1.7230   -1.4440    3.0902 C   0  0  0  0  0  0  0  0  0  0  0  0
   -2.3448   -0.7918    0.9131 O   0  0  0  0  0  0  0  0  0  0  0  0
  1  2  1  0      
  2  3  1  0      
  3  4  1  0      
  4  5  1  0      
  5  6  1  0      
  6  1  2  0      
  4  7  1  0      
  7  8  2  0      
  8  9  1  0      
  9 10  1  0      
 10  5  2  0      
  9 11  2  0      
  8 12  1  0      
  6 13  1  0      
  4 14  1  0      
  3 15  1  0      
  2 16  1  0      
 16 17  1  0      
 17 18  1  0      
 17 19  2  0      
M  END
$$$$
