# Supplementary material for: Four New Chloro-Eremophilane Sesquiterpenes from an Antarctic Deep-Sea Derived Fungus, Penicillium sp. PR19N-1
Source: MDPI journal article supplement (doi:10.3390/md11041399), 2013-04-23
Supplement: s2 [file s2]

marinedrugs-11-01399-s001.mol
  ChemDraw03101421122D

 19 20  0  0  0  0  0  0  0  0999 V2000
   -0.7388    0.4125    0.0000 C   0  0  0  0  0  0  0  0  0  0  0  0
   -0.7388   -0.4125    0.0000 C   0  0  0  0  0  0  0  0  0  0  0  0
   -0.0243   -0.8250    0.0000 C   0  0  0  0  0  0  0  0  0  0  0  0
    0.6901   -0.4125    0.0000 C   0  0  0  0  0  0  0  0  0  0  0  0
    0.6901    0.4125    0.0000 C   0  0  0  0  0  0  0  0  0  0  0  0
   -0.0243    0.8250    0.0000 C   0  0  0  0  0  0  0  0  0  0  0  0
    1.4046   -0.8250    0.0000 C   0  0  0  0  0  0  0  0  0  0  0  0
    2.1191   -0.4125    0.0000 C   0  0  0  0  0  0  0  0  0  0  0  0
    2.1191    0.4125    0.0000 C   0  0  0  0  0  0  0  0  0  0  0  0
    1.4046    0.8250    0.0000 C   0  0  0  0  0  0  0  0  0  0  0  0
    2.8335    0.8250    0.0000 O   0  0  0  0  0  0  0  0  0  0  0  0
    2.8335   -0.8250    0.0000 O   0  0  0  0  0  0  0  0  0  0  0  0
   -0.0243    1.6500    0.0000 Cl  0  0  0  0  0  0  0  0  0  0  0  0
    0.6901   -1.2375    0.0000 C   0  0  0  0  0  0  0  0  0  0  0  0
   -0.0243   -1.6500    0.0000 C   0  0  0  0  0  0  0  0  0  0  0  0
   -1.4533   -0.8250    0.0000 O   0  0  0  0  0  0  0  0  0  0  0  0
   -2.2502   -0.6115    0.0000 C   0  0  0  0  0  0  0  0  0  0  0  0
   -2.8335   -1.1948    0.0000 C   0  0  0  0  0  0  0  0  0  0  0  0
   -2.4637    0.1854    0.0000 O   0  0  0  0  0  0  0  0  0  0  0  0
  1  2  1  0      
  2  3  1  0      
  3  4  1  0      
  4  5  1  0      
  5  6  1  0      
  6  1  2  0      
  4  7  1  0      
  7  8  2  0      
  8  9  1  0      
  9 10  1  0      
 10  5  2  0      
  9 11  2  0      
  8 12  1  0      
  6 13  1  0      
  4 14  1  1      
  3 15  1  1      
  2 16  1  1      
 16 17  1  0      
 17 18  1  0      
 17 19  2  0      
M  END
