# Supplementary material for: Four New Chloro-Eremophilane Sesquiterpenes from an Antarctic Deep-Sea Derived Fungus, Penicillium sp. PR19N-1
Source: MDPI journal article supplement (doi:10.3390/md11041399), 2013-04-23
Supplement: s3 [file s3]

marinedrugs-11-01399-s002.mol
  corina  04151405343D 1   1.00000     0.00000 
CORINA 3.49 0023  12.04.2013
 20 22  0  0  0  0  0  0  0  0999 V2000
   -0.0182    1.4894    0.0102 C   0  0  0  0  0  0  0  0  0  0  0  0
    0.0021   -0.0041    0.0020 C   0  0  0  0  0  0  0  0  0  0  0  0
    1.3103   -0.5787   -0.4960 C   0  0  0  0  0  0  0  0  0  0  0  0
    2.5305    0.1215    0.0745 C   0  0  0  0  0  0  0  0  0  0  0  0
    2.4092    1.6129   -0.0231 C   0  0  0  0  0  0  0  0  0  0  0  0
    1.0808    2.2324    0.0037 C   0  0  0  0  0  0  0  0  0  0  0  0
    3.7884   -0.3714   -0.6493 C   0  0  0  0  0  0  0  0  0  0  0  0
    4.9900    0.4145   -0.1187 C   0  0  0  0  0  0  0  0  0  0  0  0
    4.8036    1.9110   -0.1430 C   0  0  0  0  0  0  0  0  0  0  0  0
    3.4923    2.4230   -0.1202 C   0  0  0  0  0  0  0  0  0  0  0  0
    5.7618    2.6565   -0.1809 O   0  0  0  0  0  0  0  0  0  0  0  0
    6.3873   -0.1465   -0.3582 C   0  0  0  0  0  0  0  0  0  0  0  0
    0.9439    3.9629    0.0267 Cl  0  0  0  0  0  0  0  0  0  0  0  0
    2.6581   -0.2574    1.5514 C   0  0  0  0  0  0  0  0  0  0  0  0
    1.3720   -2.0596   -0.1166 C   0  0  0  0  0  0  0  0  0  0  0  0
   -0.2293   -0.4738    1.3316 O   0  0  0  0  0  0  0  0  0  0  0  0
    7.5250    0.8490   -0.5936 C   0  0  0  0  0  0  0  0  0  0  0  0
    8.7225    0.1372   -0.9119 O   0  0  0  0  0  0  0  0  0  0  0  0
    6.5034   -1.4767   -1.1053 C   0  0  0  0  0  0  0  0  0  0  0  0
    5.7653   -0.1560    0.9296 O   0  0  0  0  0  0  0  0  0  0  0  0
  1  2  1  0      
  2  3  1  0      
  3  4  1  0      
  4  5  1  0      
  5  6  1  0      
  6  1  2  0      
  4  7  1  0      
  7  8  1  0      
  8  9  1  0      
  9 10  1  0      
 10  5  2  0      
  9 11  2  0      
  8 12  1  0      
  6 13  1  0      
  4 14  1  0      
  3 15  1  0      
  2 16  1  0      
 12 17  1  0      
 17 18  1  0      
 12 19  1  0      
  8 20  1  0      
 12 20  1  0      
M  END
$$$$
