# Supplementary material for: Four New Chloro-Eremophilane Sesquiterpenes from an Antarctic Deep-Sea Derived Fungus, Penicillium sp. PR19N-1
Source: MDPI journal article supplement (doi:10.3390/md11041399), 2013-04-23
Supplement: s4 [file s4]

marinedrugs-11-01399-s002.mol
  ChemDraw03101421122D

 20 22  0  0  0  0  0  0  0  0999 V2000
   -2.1434    0.4125    0.0000 C   0  0  0  0  0  0  0  0  0  0  0  0
   -2.1434   -0.4125    0.0000 C   0  0  0  0  0  0  0  0  0  0  0  0
   -1.4289   -0.8250    0.0000 C   0  0  0  0  0  0  0  0  0  0  0  0
   -0.7145   -0.4125    0.0000 C   0  0  0  0  0  0  0  0  0  0  0  0
   -0.7145    0.4125    0.0000 C   0  0  0  0  0  0  0  0  0  0  0  0
   -1.4289    0.8250    0.0000 C   0  0  0  0  0  0  0  0  0  0  0  0
    0.0000   -0.8250    0.0000 C   0  0  0  0  0  0  0  0  0  0  0  0
    0.7145   -0.4125    0.0000 C   0  0  0  0  0  0  0  0  0  0  0  0
    0.7145    0.4125    0.0000 C   0  0  0  0  0  0  0  0  0  0  0  0
    0.0000    0.8250    0.0000 C   0  0  0  0  0  0  0  0  0  0  0  0
    1.4289    0.8250    0.0000 O   0  0  0  0  0  0  0  0  0  0  0  0
    1.4289   -0.8250    0.0000 C   0  0  0  0  0  0  0  0  0  0  0  0
   -1.4289    1.6500    0.0000 Cl  0  0  0  0  0  0  0  0  0  0  0  0
   -0.7145   -1.2375    0.0000 C   0  0  0  0  0  0  0  0  0  0  0  0
   -1.4289   -1.6500    0.0000 C   0  0  0  0  0  0  0  0  0  0  0  0
   -2.8579   -0.8250    0.0000 O   0  0  0  0  0  0  0  0  0  0  0  0
    2.1434   -0.4125    0.0000 C   0  0  0  0  0  0  0  0  0  0  0  0
    2.8579   -0.8250    0.0000 O   0  0  0  0  0  0  0  0  0  0  0  0
    1.8414   -1.5395    0.0000 C   0  0  0  0  0  0  0  0  0  0  0  0
    0.7145   -1.2375    0.0000 O   0  0  0  0  0  0  0  0  0  0  0  0
  1  2  1  0      
  2  3  1  0      
  3  4  1  0      
  4  5  1  0      
  5  6  1  0      
  6  1  2  0      
  4  7  1  0      
  7  8  1  0      
  8  9  1  0      
  9 10  1  0      
 10  5  2  0      
  9 11  2  0      
  8 12  1  0      
  6 13  1  0      
  4 14  1  1      
  3 15  1  1      
  2 16  1  1      
 12 17  1  0      
 17 18  1  0      
 12 19  1  0      
  8 20  1  1      
 12 20  1  1      
M  END
