# Supplementary material for: Four New Chloro-Eremophilane Sesquiterpenes from an Antarctic Deep-Sea Derived Fungus, Penicillium sp. PR19N-1
Source: MDPI journal article supplement (doi:10.3390/md11041399), 2013-04-23
Supplement: s5 [file s5]

marinedrugs-11-01399-s003.mol
  corina  04151405343D 1   1.00000     0.00000 
CORINA 3.49 0023  12.04.2013
 18 19  0  0  0  0  0  0  0  0999 V2000
   -0.1971    1.8040   -0.4274 C   0  0  0  0  0  0  0  0  0  0  0  0
   -0.0993    0.2968   -0.1798 C   0  0  0  0  0  0  0  0  0  0  0  0
    0.5748   -0.3696   -1.3791 C   0  0  0  0  0  0  0  0  0  0  0  0
    2.0091    0.1518   -1.5237 C   0  0  0  0  0  0  0  0  0  0  0  0
    2.0050    1.6481   -1.5603 C   0  0  0  0  0  0  0  0  0  0  0  0
    1.2136    2.3928   -0.4962 C   0  0  0  0  0  0  0  0  0  0  0  0
    2.6616   -0.5165   -2.7216 C   0  0  0  0  0  0  0  0  0  0  0  0
    3.8077    0.3166   -3.2472 C   0  0  0  0  0  0  0  0  0  0  0  0
    3.4898    1.7493   -3.4903 C   0  0  0  0  0  0  0  0  0  0  0  0
    2.6657    2.3877   -2.4447 C   0  0  0  0  0  0  0  0  0  0  0  0
    3.8790    2.3489   -4.4751 O   0  0  0  0  0  0  0  0  0  0  0  0
    5.0153   -0.1952   -3.4766 C   0  0  0  0  0  0  0  0  0  0  0  0
    1.1182    4.1410   -0.9270 Cl  0  0  0  0  0  0  0  0  0  0  0  0
    2.7904   -0.2847   -0.2828 C   0  0  0  0  0  0  0  0  0  0  0  0
    0.6030   -1.8850   -1.1697 C   0  0  0  0  0  0  0  0  0  0  0  0
    5.2392   -1.6807   -3.3571 C   0  0  0  0  0  0  0  0  0  0  0  0
    6.1582    0.7109   -3.8557 C   0  0  0  0  0  0  0  0  0  0  0  0
   -0.9194    2.4180    0.6419 O   0  0  0  0  0  0  0  0  0  0  0  0
  1  2  1  0      
  2  3  1  0      
  3  4  1  0      
  4  5  1  0      
  5  6  1  0      
  6  1  1  0      
  4  7  1  0      
  7  8  1  0      
  8  9  1  0      
  9 10  1  0      
 10  5  2  0      
  9 11  2  0      
  8 12  2  0      
  4 14  1  0      
  3 15  1  0      
 12 16  1  0      
 12 17  1  0      
  1 18  1  0      
  6 13  1  0      
M  END
$$$$
