# Supplementary material for: Four New Chloro-Eremophilane Sesquiterpenes from an Antarctic Deep-Sea Derived Fungus, Penicillium sp. PR19N-1
Source: MDPI journal article supplement (doi:10.3390/md11041399), 2013-04-23
Supplement: s6 [file s6]

marinedrugs-11-01399-s003.mol
  ChemDraw03101421122D

 18 19  0  0  0  0  0  0  0  0999 V2000
   -1.7206    0.4125    0.0000 C   0  0  0  0  0  0  0  0  0  0  0  0
   -1.7206   -0.4125    0.0000 C   0  0  0  0  0  0  0  0  0  0  0  0
   -1.0062   -0.8250    0.0000 C   0  0  0  0  0  0  0  0  0  0  0  0
   -0.2917   -0.4125    0.0000 C   0  0  0  0  0  0  0  0  0  0  0  0
   -0.2917    0.4125    0.0000 C   0  0  0  0  0  0  0  0  0  0  0  0
   -1.0062    0.8250    0.0000 C   0  0  0  0  0  0  0  0  0  0  0  0
    0.4228   -0.8250    0.0000 C   0  0  0  0  0  0  0  0  0  0  0  0
    1.1373   -0.4125    0.0000 C   0  0  0  0  0  0  0  0  0  0  0  0
    1.1373    0.4125    0.0000 C   0  0  0  0  0  0  0  0  0  0  0  0
    0.4228    0.8250    0.0000 C   0  0  0  0  0  0  0  0  0  0  0  0
    1.8517    0.8250    0.0000 O   0  0  0  0  0  0  0  0  0  0  0  0
    1.8517   -0.8250    0.0000 C   0  0  0  0  0  0  0  0  0  0  0  0
   -1.0062    1.6500    0.0000 Cl  0  0  0  0  0  0  0  0  0  0  0  0
   -0.2917   -1.2375    0.0000 C   0  0  0  0  0  0  0  0  0  0  0  0
   -1.0062   -1.6500    0.0000 C   0  0  0  0  0  0  0  0  0  0  0  0
    1.8517   -1.6500    0.0000 C   0  0  0  0  0  0  0  0  0  0  0  0
    2.4351   -0.2416    0.0000 C   0  0  0  0  0  0  0  0  0  0  0  0
   -2.4351    0.8250    0.0000 O   0  0  0  0  0  0  0  0  0  0  0  0
  1  2  1  0      
  2  3  1  0      
  3  4  1  0      
  4  5  1  0      
  5  6  1  0      
  6  1  1  0      
  4  7  1  0      
  7  8  1  0      
  8  9  1  0      
  9 10  1  0      
 10  5  2  0      
  9 11  2  0      
  8 12  2  0      
  4 14  1  1      
  3 15  1  1      
 12 16  1  0      
 12 17  1  0      
  1 18  1  1      
  6 13  1  6      
M  END
