# Supplementary material for: Four New Chloro-Eremophilane Sesquiterpenes from an Antarctic Deep-Sea Derived Fungus, Penicillium sp. PR19N-1
Source: MDPI journal article supplement (doi:10.3390/md11041399), 2013-04-23
Supplement: s7 [file s7]

marinedrugs-11-01399-s004.mol
  corina  04151405343D 1   1.00000     0.00000 
CORINA 3.49 0023  12.04.2013
 25 28  0  0  0  0  0  0  0  0999 V2000
    0.5344    1.8360    0.0736 C   0  0  0  0  0  0  0  0  0  0  0  0
    0.4087    0.3175    0.1974 C   0  0  0  0  0  0  0  0  0  0  0  0
    0.6434   -0.3404   -1.1652 C   0  0  0  0  0  0  0  0  0  0  0  0
    2.0652   -0.0246   -1.6334 C   0  0  0  0  0  0  0  0  0  0  0  0
    2.2606    1.4615   -1.6530 C   0  0  0  0  0  0  0  0  0  0  0  0
    1.9566    2.2068   -0.3586 C   0  0  0  0  0  0  0  0  0  0  0  0
    2.3645   -0.7293   -2.9518 C   0  0  0  0  0  0  0  0  0  0  0  0
    3.3591    0.1069   -3.7209 C   0  0  0  0  0  0  0  0  0  0  0  0
    2.8948    1.5552   -4.0095 C   0  0  0  0  0  0  0  0  0  0  0  0
    2.6418    2.1832   -2.6762 C   0  0  0  0  0  0  0  0  0  0  0  0
    2.0655    3.9847   -0.6379 Cl  0  0  0  0  0  0  0  0  0  0  0  0
    3.0287   -0.6028   -0.5949 C   0  0  0  0  0  0  0  0  0  0  0  0
    0.4709   -1.8554   -1.0386 C   0  0  0  0  0  0  0  0  0  0  0  0
    0.2491    2.4405    1.3366 O   0  0  0  0  0  0  0  0  0  0  0  0
    1.3941   -0.1720    1.1449 O   0  0  0  0  0  0  0  0  0  0  0  0
    1.0204   -0.2397    2.4324 C   0  0  0  0  0  0  0  0  0  0  0  0
    1.9897   -0.7379    3.4731 C   0  0  0  0  0  0  0  0  0  0  0  0
   -0.0932    0.0988    2.7568 O   0  0  0  0  0  0  0  0  0  0  0  0
    4.2556   -0.2433   -4.8944 C   0  0  0  0  0  0  0  0  0  0  0  0
    4.3138    1.0781   -5.7188 C   0  0  0  0  0  0  0  0  0  0  0  0
    3.9865    2.1152   -4.7500 O   0  0  0  0  0  0  0  0  0  0  0  0
    4.7561   -0.1458   -3.5534 O   0  0  0  0  0  0  0  0  0  0  0  0
    4.2140   -1.5782   -5.6408 C   0  0  0  0  0  0  0  0  0  0  0  0
    1.6981    1.5490   -4.7904 O   0  0  0  0  0  0  0  0  0  0  0  0
    1.2628    2.8478   -5.1973 C   0  0  0  0  0  0  0  0  0  0  0  0
  1  2  1  0      
  2  3  1  0      
  3  4  1  0      
  4  5  1  0      
  5  6  1  0      
  6  1  1  0      
  4  7  1  0      
  7  8  1  0      
  8  9  1  0      
  9 10  1  0      
 10  5  2  0      
  4 12  1  0      
  3 13  1  0      
  1 14  1  0      
  6 11  1  0      
  2 15  1  0      
 15 16  1  0      
 16 17  1  0      
 16 18  2  0      
 19 20  1  0      
 20 21  1  0      
 21  9  1  0      
  8 19  1  0      
  8 22  1  0      
 19 22  1  0      
 19 23  1  0      
  9 24  1  0      
 24 25  1  0      
M  END
$$$$
