# Supplementary material for: Four New Chloro-Eremophilane Sesquiterpenes from an Antarctic Deep-Sea Derived Fungus, Penicillium sp. PR19N-1
Source: MDPI journal article supplement (doi:10.3390/md11041399), 2013-04-23
Supplement: s8 [file s8]

marinedrugs-11-01399-s004.mol
  ChemDraw03101421132D

 25 28  0  0  0  0  0  0  0  0999 V2000
   -1.5188    0.4125    0.0000 C   0  0  0  0  0  0  0  0  0  0  0  0
   -1.5188   -0.4125    0.0000 C   0  0  0  0  0  0  0  0  0  0  0  0
   -0.8044   -0.8250    0.0000 C   0  0  0  0  0  0  0  0  0  0  0  0
   -0.0899   -0.4125    0.0000 C   0  0  0  0  0  0  0  0  0  0  0  0
   -0.0899    0.4125    0.0000 C   0  0  0  0  0  0  0  0  0  0  0  0
   -0.8044    0.8250    0.0000 C   0  0  0  0  0  0  0  0  0  0  0  0
    0.6246   -0.8250    0.0000 C   0  0  0  0  0  0  0  0  0  0  0  0
    1.3390   -0.4125    0.0000 C   0  0  0  0  0  0  0  0  0  0  0  0
    1.3390    0.4125    0.0000 C   0  0  0  0  0  0  0  0  0  0  0  0
    0.6246    0.8250    0.0000 C   0  0  0  0  0  0  0  0  0  0  0  0
   -0.8044    1.6500    0.0000 Cl  0  0  0  0  0  0  0  0  0  0  0  0
   -0.0899   -1.2375    0.0000 C   0  0  0  0  0  0  0  0  0  0  0  0
   -0.8044   -1.6500    0.0000 C   0  0  0  0  0  0  0  0  0  0  0  0
   -2.2333    0.8250    0.0000 O   0  0  0  0  0  0  0  0  0  0  0  0
   -2.1022   -0.9959    0.0000 O   0  0  0  0  0  0  0  0  0  0  0  0
   -2.8991   -0.7823    0.0000 C   0  0  0  0  0  0  0  0  0  0  0  0
   -3.4825   -1.3657    0.0000 C   0  0  0  0  0  0  0  0  0  0  0  0
   -3.1126    0.0146    0.0000 O   0  0  0  0  0  0  0  0  0  0  0  0
    2.7680   -0.4125    0.0000 C   0  0  0  0  0  0  0  0  0  0  0  0
    2.7680    0.4125    0.0000 C   0  0  0  0  0  0  0  0  0  0  0  0
    2.0535    0.8250    0.0000 O   0  0  0  0  0  0  0  0  0  0  0  0
    2.0535   -0.8250    0.0000 O   0  0  0  0  0  0  0  0  0  0  0  0
    3.4825   -0.8250    0.0000 C   0  0  0  0  0  0  0  0  0  0  0  0
    1.3390    1.2375    0.0000 O   0  0  0  0  0  0  0  0  0  0  0  0
    0.6246    1.6500    0.0000 C   0  0  0  0  0  0  0  0  0  0  0  0
  1  2  1  0      
  2  3  1  0      
  3  4  1  0      
  4  5  1  0      
  5  6  1  0      
  6  1  1  0      
  4  7  1  0      
  7  8  1  0      
  8  9  1  0      
  9 10  1  0      
 10  5  2  0      
  4 12  1  1      
  3 13  1  1      
  1 14  1  1      
  6 11  1  6      
  2 15  1  1      
 15 16  1  0      
 16 17  1  0      
 16 18  2  0      
 19 20  1  0      
 20 21  1  0      
 21  9  1  0      
  8 19  1  0      
  8 22  1  1      
 19 22  1  1      
 19 23  1  0      
  9 24  1  6      
 24 25  1  0      
M  END
