# Supplementary material for: Four New Chloro-Eremophilane Sesquiterpenes from an Antarctic Deep-Sea Derived Fungus, Penicillium sp. PR19N-1
Source: MDPI journal article supplement (doi:10.3390/md11041399), 2013-04-23
Supplement: s9 [file s9]

marinedrugs-11-01399-s005.mol
  corina  04151405343D 1   1.00000     0.00000 
CORINA 3.49 0023  12.04.2013
 23 26  0  0  0  0  0  0  0  0999 V2000
   -0.0186    1.5174    0.0104 C   0  0  0  0  0  0  0  0  0  0  0  0
    0.0021   -0.0041    0.0020 C   0  0  0  0  0  0  0  0  0  0  0  0
    1.2506   -0.5653   -0.6359 C   0  0  0  0  0  0  0  0  0  0  0  0
    2.5394   -0.0015   -0.0668 C   0  0  0  0  0  0  0  0  0  0  0  0
    2.5759    1.4943   -0.1254 C   0  0  0  0  0  0  0  0  0  0  0  0
    1.2968    2.2865    0.0020 C   0  0  0  0  0  0  0  0  0  0  0  0
    3.7227   -0.6223   -0.8186 C   0  0  0  0  0  0  0  0  0  0  0  0
    5.0207    0.0031   -0.3074 C   0  0  0  0  0  0  0  0  0  0  0  0
    5.0123    1.5125   -0.3220 C   0  0  0  0  0  0  0  0  0  0  0  0
    3.7137    2.1833   -0.2494 C   0  0  0  0  0  0  0  0  0  0  0  0
    2.6432   -0.4277    1.3990 C   0  0  0  0  0  0  0  0  0  0  0  0
    1.2558   -2.0833   -0.4448 C   0  0  0  0  0  0  0  0  0  0  0  0
   -0.0807   -0.4818    1.3707 O   0  0  0  0  0  0  0  0  0  0  0  0
   -1.3088   -0.6981    1.8674 C   0  0  0  0  0  0  0  0  0  0  0  0
   -1.4733   -1.1943    3.2808 C   0  0  0  0  0  0  0  0  0  0  0  0
   -2.2824   -0.4949    1.1813 O   0  0  0  0  0  0  0  0  0  0  0  0
    6.0445    2.1464   -0.3918 O   0  0  0  0  0  0  0  0  0  0  0  0
    0.5144    2.1539    1.1818 O   0  0  0  0  0  0  0  0  0  0  0  0
    6.3355   -0.7173   -0.5821 C   0  0  0  0  0  0  0  0  0  0  0  0
    7.5780    0.1383   -0.8373 C   0  0  0  0  0  0  0  0  0  0  0  0
    8.6752   -0.7077   -1.1871 O   0  0  0  0  0  0  0  0  0  0  0  0
    6.2766   -2.0454   -1.3394 C   0  0  0  0  0  0  0  0  0  0  0  0
    5.7445   -0.6636    0.7193 O   0  0  0  0  0  0  0  0  0  0  0  0
  1  2  1  0      
  2  3  1  0      
  3  4  1  0      
  4  5  1  0      
  5  6  1  0      
  6  1  1  0      
  4  7  1  0      
  7  8  1  0      
  8  9  1  0      
  9 10  1  0      
 10  5  2  0      
  4 11  1  0      
  3 12  1  0      
  2 13  1  0      
 13 14  1  0      
 14 15  1  0      
 14 16  2  0      
 17  9  2  0      
  1 18  1  0      
  6 18  1  0      
  8 19  1  0      
 19 20  1  0      
 20 21  1  0      
 19 22  1  0      
  8 23  1  0      
 19 23  1  0      
M  END
$$$$
