# Supplementary material for: Four New Chloro-Eremophilane Sesquiterpenes from an Antarctic Deep-Sea Derived Fungus, Penicillium sp. PR19N-1
Source: MDPI journal article supplement (doi:10.3390/md11041399), 2013-04-23
Supplement: s10 [file s10]

marinedrugs-11-01399-s005.mol
  ChemDraw03101421132D

 23 26  0  0  0  0  0  0  0  0999 V2000
   -1.4289    0.6901    0.0000 C   0  0  0  0  0  0  0  0  0  0  0  0
   -1.4289   -0.1349    0.0000 C   0  0  0  0  0  0  0  0  0  0  0  0
   -0.7145   -0.5474    0.0000 C   0  0  0  0  0  0  0  0  0  0  0  0
    0.0000   -0.1349    0.0000 C   0  0  0  0  0  0  0  0  0  0  0  0
    0.0000    0.6901    0.0000 C   0  0  0  0  0  0  0  0  0  0  0  0
   -0.7145    1.1026    0.0000 C   0  0  0  0  0  0  0  0  0  0  0  0
    0.7145   -0.5474    0.0000 C   0  0  0  0  0  0  0  0  0  0  0  0
    1.4289   -0.1349    0.0000 C   0  0  0  0  0  0  0  0  0  0  0  0
    1.4289    0.6901    0.0000 C   0  0  0  0  0  0  0  0  0  0  0  0
    0.7145    1.1026    0.0000 C   0  0  0  0  0  0  0  0  0  0  0  0
    0.0000   -0.9599    0.0000 C   0  0  0  0  0  0  0  0  0  0  0  0
   -0.7145   -1.3724    0.0000 C   0  0  0  0  0  0  0  0  0  0  0  0
   -2.0123   -0.7182    0.0000 O   0  0  0  0  0  0  0  0  0  0  0  0
   -2.8092   -0.5047    0.0000 C   0  0  0  0  0  0  0  0  0  0  0  0
   -3.3926   -1.0881    0.0000 C   0  0  0  0  0  0  0  0  0  0  0  0
   -3.0227    0.2922    0.0000 O   0  0  0  0  0  0  0  0  0  0  0  0
    2.1434    1.1026    0.0000 O   0  0  0  0  0  0  0  0  0  0  0  0
   -1.4289    1.5151    0.0000 O   0  0  0  0  0  0  0  0  0  0  0  0
    2.0123   -0.7182    0.0000 C   0  0  0  0  0  0  0  0  0  0  0  0
    2.8092   -0.5047    0.0000 C   0  0  0  0  0  0  0  0  0  0  0  0
    3.3926   -1.0881    0.0000 O   0  0  0  0  0  0  0  0  0  0  0  0
    2.2258   -1.5151    0.0000 C   0  0  0  0  0  0  0  0  0  0  0  0
    1.2154   -0.9318    0.0000 O   0  0  0  0  0  0  0  0  0  0  0  0
  1  2  1  0      
  2  3  1  0      
  3  4  1  0      
  4  5  1  0      
  5  6  1  0      
  6  1  1  0      
  4  7  1  0      
  7  8  1  0      
  8  9  1  0      
  9 10  1  0      
 10  5  2  0      
  4 11  1  1      
  3 12  1  1      
  2 13  1  1      
 13 14  1  0      
 14 15  1  0      
 14 16  2  0      
 17  9  2  0      
  1 18  1  1      
  6 18  1  1      
  8 19  1  0      
 19 20  1  0      
 20 21  1  0      
 19 22  1  0      
  8 23  1  1      
 19 23  1  1      
M  END
