# Supplementary material for: Four New Chloro-Eremophilane Sesquiterpenes from an Antarctic Deep-Sea Derived Fungus, Penicillium sp. PR19N-1
Source: MDPI journal article supplement (doi:10.3390/md11041399), 2013-04-23
Supplement: s11 [file s11]

marinedrugs-11-01399-s006.mol
  corina  04151405353D 1   1.00000     0.00000 
CORINA 3.49 0023  12.04.2013
 23 27  0  0  0  0  0  0  0  0999 V2000
   -0.1197    1.3287   -0.0276 C   0  0  0  0  0  0  0  0  0  0  0  0
    0.0143   -0.1908   -0.0131 C   0  0  0  0  0  0  0  0  0  0  0  0
    1.3501   -0.6386   -0.6047 C   0  0  0  0  0  0  0  0  0  0  0  0
    2.4846    0.0520    0.1540 C   0  0  0  0  0  0  0  0  0  0  0  0
    2.4603    1.5141   -0.1769 C   0  0  0  0  0  0  0  0  0  0  0  0
    1.1207    2.2177   -0.0392 C   0  0  0  0  0  0  0  0  0  0  0  0
    3.8165   -0.6423   -0.1013 C   0  0  0  0  0  0  0  0  0  0  0  0
    4.9157    0.3811    0.0597 C   0  0  0  0  0  0  0  0  0  0  0  0
    4.7992    1.6048   -0.8800 C   0  0  0  0  0  0  0  0  0  0  0  0
    3.4702    2.2282   -0.6061 C   0  0  0  0  0  0  0  0  0  0  0  0
    2.1901   -0.0885    1.6488 C   0  0  0  0  0  0  0  0  0  0  0  0
    1.4894   -2.1558   -0.4650 C   0  0  0  0  0  0  0  0  0  0  0  0
   -0.0806   -0.6629    1.3567 O   0  0  0  0  0  0  0  0  0  0  0  0
   -1.3058   -0.9668    1.8131 C   0  0  0  0  0  0  0  0  0  0  0  0
   -1.4823   -1.4631    3.2250 C   0  0  0  0  0  0  0  0  0  0  0  0
   -2.2671   -0.8424    1.0918 O   0  0  0  0  0  0  0  0  0  0  0  0
    6.4082    0.2157    0.2778 C   0  0  0  0  0  0  0  0  0  0  0  0
    7.0265    1.4323   -0.4757 C   0  0  0  0  0  0  0  0  0  0  0  0
    5.9396    2.4005   -0.5373 O   0  0  0  0  0  0  0  0  0  0  0  0
    5.5144    0.5559    1.3468 O   0  0  0  0  0  0  0  0  0  0  0  0
    7.1402   -1.1273    0.2390 C   0  0  0  0  0  0  0  0  0  0  0  0
    4.8690    1.1831   -2.2435 O   0  0  0  0  0  0  0  0  0  0  0  0
    0.3586    2.0105    1.1425 O   0  0  0  0  0  0  0  0  0  0  0  0
  1  2  1  0      
  2  3  1  0      
  3  4  1  0      
  4  5  1  0      
  5  6  1  0      
  6  1  1  0      
  4  7  1  0      
  7  8  1  0      
  8  9  1  0      
  9 10  1  0      
 10  5  2  0      
  4 11  1  0      
  3 12  1  0      
  2 13  1  0      
 13 14  1  0      
 14 15  1  0      
 14 16  2  0      
 17 18  1  0      
 18 19  1  0      
 19  9  1  0      
  8 17  1  0      
  8 20  1  0      
 17 20  1  0      
 17 21  1  0      
  9 22  1  0      
  1 23  1  0      
  6 23  1  0      
M  END
$$$$
