# Supplementary material for: Four New Chloro-Eremophilane Sesquiterpenes from an Antarctic Deep-Sea Derived Fungus, Penicillium sp. PR19N-1
Source: MDPI journal article supplement (doi:10.3390/md11041399), 2013-04-23
Supplement: s12 [file s12]

marinedrugs-11-01399-s006.mol
  ChemDraw03101421142D

 23 27  0  0  0  0  0  0  0  0999 V2000
   -1.5188    0.6188    0.0000 C   0  0  0  0  0  0  0  0  0  0  0  0
   -1.5188   -0.2062    0.0000 C   0  0  0  0  0  0  0  0  0  0  0  0
   -0.8044   -0.6188    0.0000 C   0  0  0  0  0  0  0  0  0  0  0  0
   -0.0899   -0.2062    0.0000 C   0  0  0  0  0  0  0  0  0  0  0  0
   -0.0899    0.6188    0.0000 C   0  0  0  0  0  0  0  0  0  0  0  0
   -0.8044    1.0313    0.0000 C   0  0  0  0  0  0  0  0  0  0  0  0
    0.6246   -0.6188    0.0000 C   0  0  0  0  0  0  0  0  0  0  0  0
    1.3390   -0.2062    0.0000 C   0  0  0  0  0  0  0  0  0  0  0  0
    1.3390    0.6188    0.0000 C   0  0  0  0  0  0  0  0  0  0  0  0
    0.6246    1.0313    0.0000 C   0  0  0  0  0  0  0  0  0  0  0  0
   -0.0899   -1.0313    0.0000 C   0  0  0  0  0  0  0  0  0  0  0  0
   -0.8044   -1.4438    0.0000 C   0  0  0  0  0  0  0  0  0  0  0  0
   -2.1022   -0.7896    0.0000 O   0  0  0  0  0  0  0  0  0  0  0  0
   -2.8991   -0.5761    0.0000 C   0  0  0  0  0  0  0  0  0  0  0  0
   -3.4825   -1.1595    0.0000 C   0  0  0  0  0  0  0  0  0  0  0  0
   -3.1126    0.2208    0.0000 O   0  0  0  0  0  0  0  0  0  0  0  0
    2.7680   -0.2062    0.0000 C   0  0  0  0  0  0  0  0  0  0  0  0
    2.7680    0.6188    0.0000 C   0  0  0  0  0  0  0  0  0  0  0  0
    2.0535    1.0313    0.0000 O   0  0  0  0  0  0  0  0  0  0  0  0
    2.0535   -0.6188    0.0000 O   0  0  0  0  0  0  0  0  0  0  0  0
    3.4825   -0.6188    0.0000 C   0  0  0  0  0  0  0  0  0  0  0  0
    1.3390    1.4438    0.0000 O   0  0  0  0  0  0  0  0  0  0  0  0
   -1.5188    1.4438    0.0000 O   0  0  0  0  0  0  0  0  0  0  0  0
  1  2  1  0      
  2  3  1  0      
  3  4  1  0      
  4  5  1  0      
  5  6  1  0      
  6  1  1  0      
  4  7  1  0      
  7  8  1  0      
  8  9  1  0      
  9 10  1  0      
 10  5  2  0      
  4 11  1  1      
  3 12  1  1      
  2 13  1  1      
 13 14  1  0      
 14 15  1  0      
 14 16  2  0      
 17 18  1  0      
 18 19  1  0      
 19  9  1  0      
  8 17  1  0      
  8 20  1  1      
 17 20  1  1      
 17 21  1  0      
  9 22  1  6      
  1 23  1  1      
  6 23  1  1      
M  END
